# Supplementary material for: A Pyrosequencing Investigation of Differences in the Feline Subgingival Microbiota in Health, Gingivitis and Mild Periodontitis
Source: PubMed Central journal article supplement (PMC4659563; doi:10.1371/journal.pone.0136986), 2015-11-25
Supplement: pone.0136986.s001.pdf [file pone.0136986.s001.pdf]

- Relative prevalence in Health
- Relative prevalence in Gingivitis
- Relative prevalence in PD1
- Significance (yes/no)

0.03

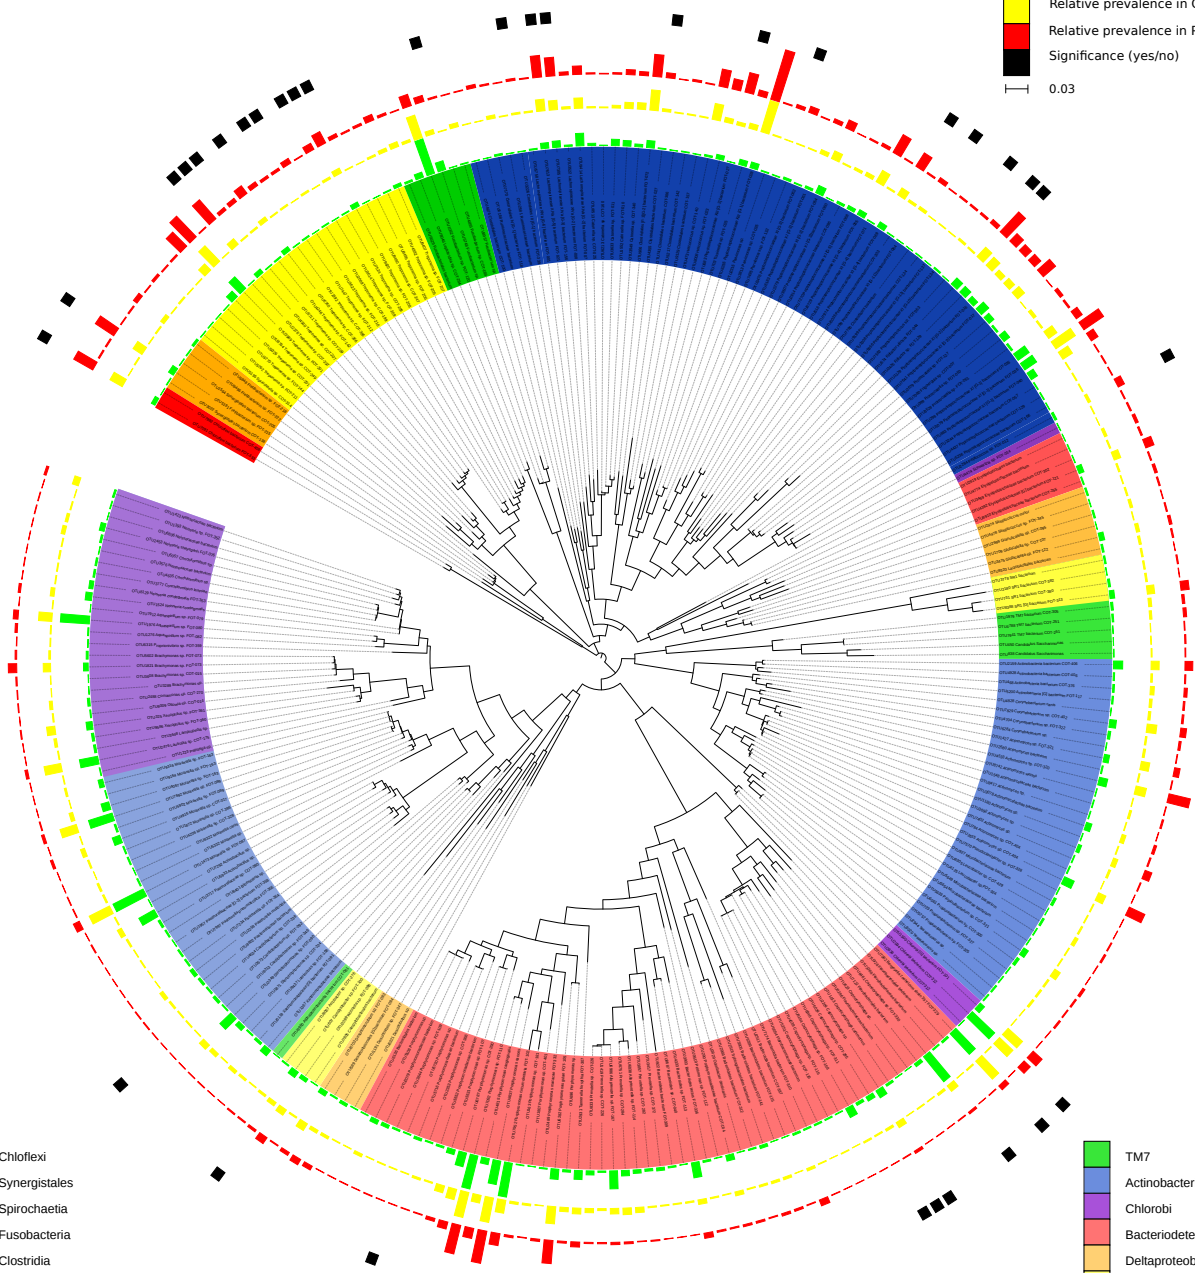

- Chloflexi
- Synergistales
- Spirochaeta
- Fusobacteria
- Clostridia
- Negativicutes
- Erysipelotrichia
- Bacilli
- SR1

- TM7
- Actinobacteria
- Chlorobi
- Bacteroidetes
- Deltaproteobacteria
- Epsilonproteobacteria
- Alphaproteobacteria
- Gammaproteobacteria
- Betaproteobacteria
