# Supplementary material for: A Pyrosequencing Investigation of Differences in the Feline Subgingival Microbiota in Health, Gingivitis and Mild Periodontitis
Source: PubMed Central journal article supplement (PMC4659563; doi:10.1371/journal.pone.0136986), 2015-11-25

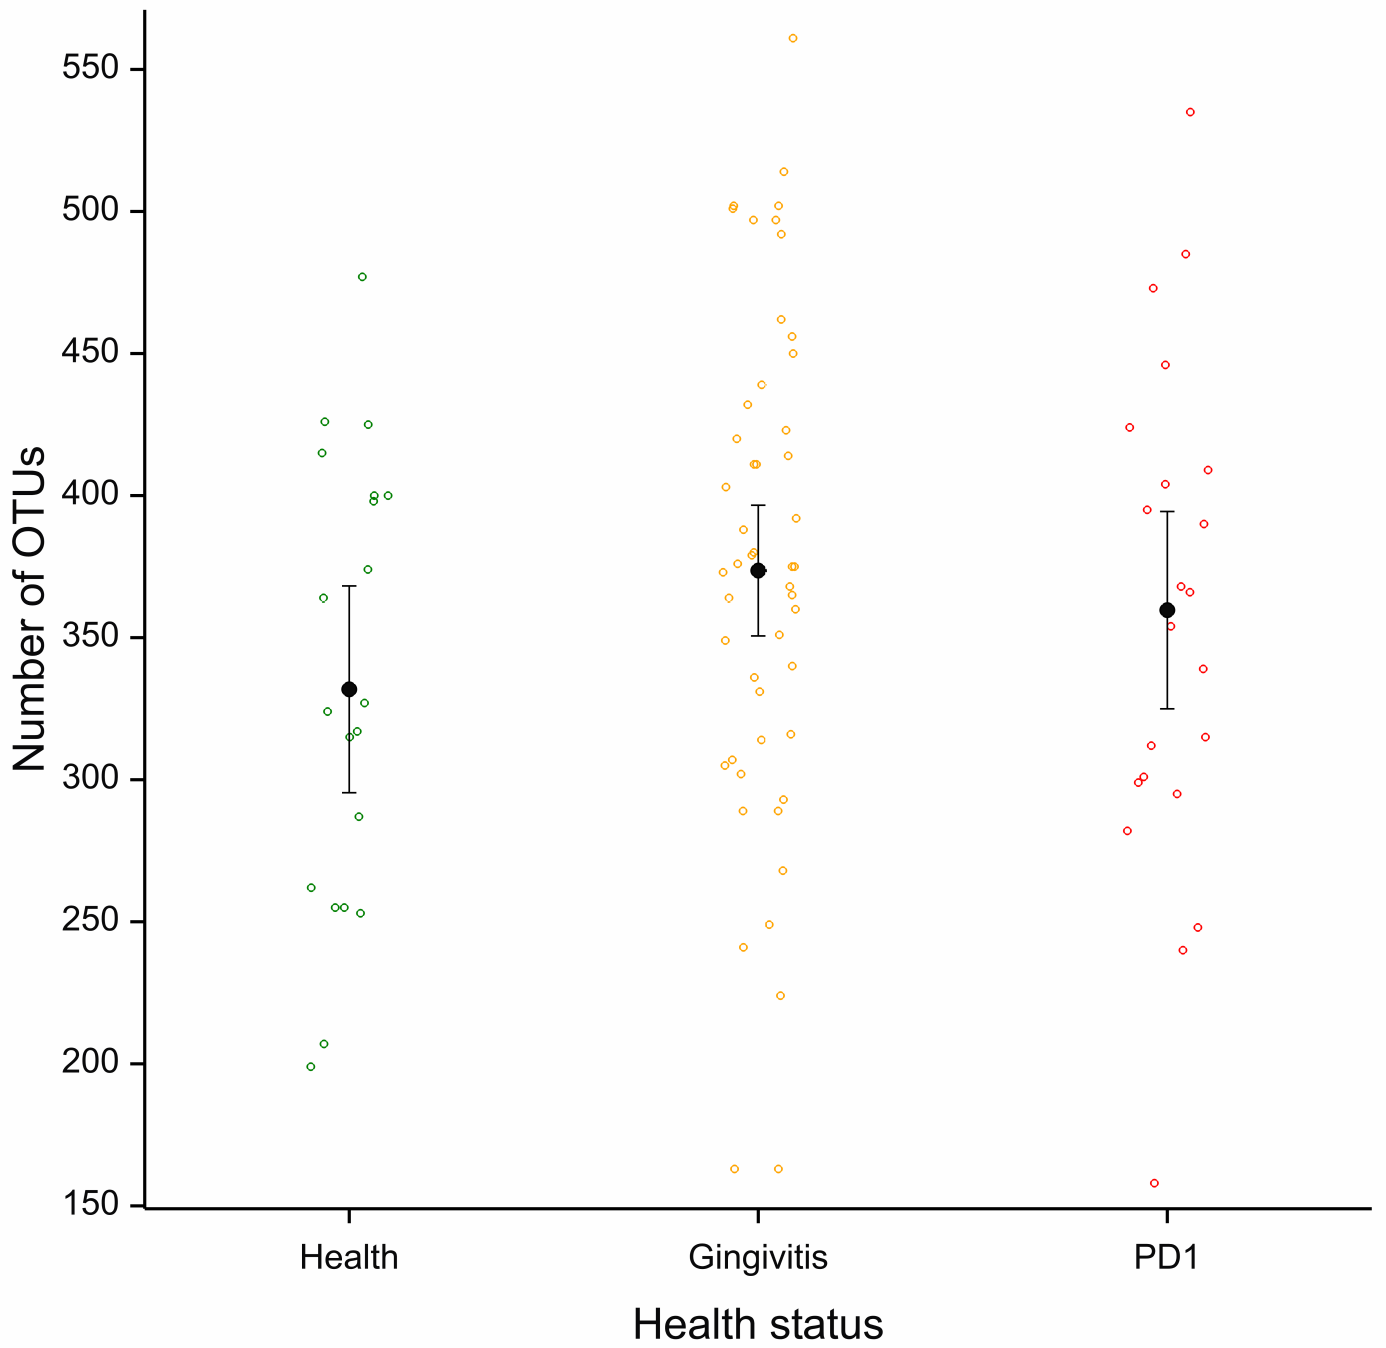

Supplement: pone.0136986.s003.pdf [file pone.0136986.s003.pdf]
