# Supplementary material for: A Pyrosequencing Investigation of Differences in the Feline Subgingival Microbiota in Health, Gingivitis and Mild Periodontitis
Source: PLoS One. 2015 Nov 25;10(11):e0136986. doi: 10.1371/journal.pone.0136986 (PMC4659563; doi:10.1371/journal.pone.0136986)
Supplement: S4 Table — (XLSX) [file pone.0136986.s008.xlsx]

## Sheet: Sheet1
Species	BH adjusted overall health status p-value	Pair-wise p-value between health states			Average % (95% Confidence Interval)			Fold Change
		Health v Gingivitis	Health v PD1	Gingivitis v PD1	Health	Gingivitis	PD1	Health/ Gingivitis	Health/ PD1	Gingivitis/ PD1
OTU325 Xenophilus sp. FOT-361	0.0178488	0.28639	0.00710944	0.00100405	0.576 (0.348, 0.95)	0.783 (0.596, 1.029)	0.093 (0.027, 0.313)	0.734777	6.20374	8.44302
OTU2392 Treponema sp. COT-356	0.0178488	0.267155	<0.001	<0.001	0.062 (0.027, 0.145)	0.106 (0.07, 0.16)	0.413 (0.3, 0.569)	0.588441	0.150629	0.25598
OTU3308 Peptostreptococcaceae XI [G-13] bacterium FOT-137	0.0178488	0.210091	<0.001	<0.001	0.028 (0.012, 0.063)	0.049 (0.033, 0.073)	0.152 (0.108, 0.214)	0.560544	0.181566	0.323911
OTU3623 Treponema sp. FOT-210	0.0178488	0.272801	<0.001	<0.001	0.016 (0.004, 0.064)	0.037 (0.021, 0.066)	0.233 (0.165, 0.331)	0.439642	0.0697918	0.158747
OTU4333 Bacteroides sp. FOT-113	0.0178488	<0.001	<0.001	0.643542	1.434 (1.123, 1.829)	0.435 (0.328, 0.577)	0.489 (0.325, 0.734)	3.29638	2.93543	0.890502
OTU4355 Clostridiales bacterium COT-027	0.0178488	0.0084097	<0.001	0.00431659	0.081 (0.037, 0.177)	0.251 (0.189, 0.333)	0.47 (0.342, 0.645)	0.321075	0.171464	0.534032
OTU4910 Treponema sp. COT-207	0.0178488	0.270288	<0.001	<0.001	0.431 (0.204, 0.908)	0.688 (0.472, 1)	2.381 (1.752, 3.229)	0.627572	0.181212	0.288751
OTU5711 Treponema sp. COT-209	0.0178488	0.213854	<0.001	<0.001	0.07 (0.036, 0.138)	0.113 (0.08, 0.158)	0.312 (0.229, 0.426)	0.620951	0.224246	0.361133
OTU5716 Porphyromonadaceae bacterium	0.0178488	<0.001	<0.001	0.308325	0.231 (0.166, 0.321)	0.065 (0.044, 0.097)	0.042 (0.02, 0.089)	3.54087	5.50019	1.55335
OTU6034 Capnocytophaga sp. COT-295	0.0178488	0.00219824	<0.001	0.0244942	0.44 (0.31, 0.624)	0.206 (0.148, 0.285)	0.072 (0.031, 0.169)	2.13847	6.0747	2.84067
OTU7524 Treponema sp. COT-208	0.0178488	0.0909249	<0.001	<0.001	0.084 (0.033, 0.214)	0.2 (0.136, 0.295)	0.651 (0.469, 0.901)	0.418256	0.128885	0.308148
OTU7613 Lachnospiraceae XIVa [G-5] bacterium FOT-021	0.0178488	0.0338594	<0.001	0.00325798	0.524 (0.28, 0.978)	1.098 (0.834, 1.444)	2.054 (1.511, 2.787)	0.477254	0.255084	0.534482
OTU9420 Treponema sp. FOT-208	0.0178488	0.549077	<0.001	<0.001	0.418 (0.256, 0.682)	0.496 (0.372, 0.661)	1.205 (0.91, 1.596)	0.841889	0.346509	0.411585
OTU9480 Treponema sp. COT-247	0.0178488	0.178209	<0.001	<0.001	0.035 (0.012, 0.096)	0.074 (0.047, 0.115)	0.33 (0.239, 0.454)	0.46816	0.104872	0.224009
OTU9586 Xenophilus sp. FOT-360	0.0178488	0.611553	0.00476187	0.00184105	0.215 (0.132, 0.351)	0.249 (0.187, 0.332)	0.025 (0.006, 0.101)	0.864647	8.47487	9.80154
OTU583 Peptostreptococcaceae XIII [G-2] bacterium FOT-027	0.0281823	0.19009	0.0335923	<0.001	0.018 (0, 1.288)	0.316 (0.166, 0.6)	1.895 (1.27, 2.82)	0.055383	0.00923549	0.166757
OTU2094 Chlorobi bacterium COT-312	0.0281823	0.0224641	<0.001	0.027351	2.916 (2.08, 4.073)	1.751 (1.326, 2.308)	0.808 (0.431, 1.511)	1.66546	3.6066	2.16552
OTU3813 Parvimonas sp. COT-035	0.0281823	0.603883	0.00101576	<0.001	0.061 (0.025, 0.147)	0.045 (0.024, 0.087)	0.316 (0.217, 0.461)	1.33506	0.191895	0.143735
OTU8346 Capnocytophaga sp. FOT-311	0.0281823	0.00163361	<0.001	0.0155901	0.25 (0.176, 0.354)	0.113 (0.081, 0.158)	0.033 (0.013, 0.084)	2.2034	7.62541	3.46074
OTU2284 Peptococcus sp. FOT-012	0.0365089	0.525977	0.00215535	<0.001	0.197 (0.101, 0.385)	0.253 (0.173, 0.368)	0.659 (0.461, 0.94)	0.781877	0.299718	0.383332
OTU6461 Capnocytophaga sp. FOT-330	0.0365089	<0.001	0.00109294	0.159228	3.049 (2.026, 4.564)	0.66 (0.377, 1.154)	0.203 (0.043, 0.956)	4.62057	14.9972	3.24575
OTU7082 Bergeyella zoohelcum strain 357 FOT-329	0.0365089	0.620569	0.00477904	0.00671428	2.673 (1.671, 4.252)	2.32 (1.683, 3.19)	0.487 (0.166, 1.424)	1.15219	5.48472	4.76026
OTU2089 Treponema sp. COT-199	0.0382475	0.235652	<0.001	<0.001	0.09 (0.036, 0.223)	0.164 (0.107, 0.252)	0.507 (0.349, 0.734)	0.547078	0.177565	0.32457
OTU3417 Prevotella sp. COT-372	0.0382475	<0.001	<0.001	0.0529513	0.283 (0.193, 0.413)	0.091 (0.059, 0.139)	0.025 (0.007, 0.086)	3.10916	11.4657	3.68772
OTU4855 Fusobacterium sp. COT-169	0.0382475	0.248245	0.00157079	0.00118048	0.035 (0.016, 0.074)	0.057 (0.039, 0.083)	0.138 (0.096, 0.2)	0.609287	0.250349	0.410888
OTU7091 Chloroflexi bacterium FOT-333	0.0382475	0.0115241	<0.001	0.0778244	0.381 (0.153, 0.951)	1.333 (0.977, 1.816)	2.07 (1.415, 3.018)	0.286144	0.18429	0.644047
OTU7582 Peptostreptococcus sp. FOT-053	0.0382475	0.0706104	0.00202208	<0.001	0.024 (0.004, 0.135)	0.125 (0.077, 0.203)	0.411 (0.274, 0.616)	0.19173	0.0584668	0.304944
OTU7952 Porphyromonas circumdentaria FOT-102	0.0382475	<0.001	0.00126988	0.803802	3.247 (2.35, 4.471)	1.239 (0.885, 1.732)	1.145 (0.669, 1.951)	2.6213	2.83718	1.08236
OTU574 Filifactor villosus FOT-044	0.0418332	0.193494	<0.001	<0.001	0.773 (0.425, 1.402)	1.203 (0.885, 1.633)	2.573 (1.87, 3.53)	0.642828	0.300556	0.467553
OTU607 Campylobacter sp. FOT-100	0.0418332	0.0188803	<0.001	0.0427184	0.614 (0.452, 0.833)	0.382 (0.299, 0.489)	0.214 (0.129, 0.354)	1.60536	2.86775	1.78635
OTU2204 Capnocytophaga sp.	0.0418332	0.14526	0.00120159	0.0115419	0.771 (0.547, 1.086)	0.562 (0.435, 0.726)	0.241 (0.132, 0.439)	1.37277	3.19914	2.33043
OTU4246 Treponema sp. FOT-142	0.0418332	0.54746	0.00312615	<0.001	0.115 (0.057, 0.232)	0.147 (0.099, 0.218)	0.389 (0.268, 0.564)	0.781819	0.295222	0.377609
OTU3573 Cardiobacterium sp. FOT-092	0.045897	0.00178716	<0.001	0.0301017	0.238 (0.162, 0.35)	0.099 (0.068, 0.145)	0.027 (0.009, 0.082)	2.39917	8.83648	3.68314
OTU7305 Lachnospiraceae XIVa [G-3] bacterium FOT-156	0.045897	0.280961	0.00304442	0.00426849	0.603 (0.328, 1.107)	0.878 (0.637, 1.209)	1.759 (1.245, 2.48)	0.687019	0.342733	0.498869
OTU7974 Peptostreptococcaceae XI [G-4] bacterium FOT-069	0.045897	0.170292	<0.001	0.00169369	0.506 (0.297, 0.863)	0.769 (0.584, 1.012)	1.496 (1.106, 2.02)	0.658475	0.338573	0.514177
OTU799 Peptostreptococcaceae XI [G-11] bacterium FOT-064	0.0480545	0.0165579	0.0039653	0.143782	0.039 (0.009, 0.175)	0.261 (0.181, 0.378)	0.403 (0.256, 0.635)	0.1495	0.0968571	0.647873
OTU2180 SR1 bacterium COT-382	0.0480545	0.00183594	0.0195039	0.380904	0.044 (0.023, 0.084)	0.135 (0.106, 0.171)	0.11 (0.073, 0.164)	0.322694	0.39697	1.23018
OTU3226 Clostridiales III [G-1] bacterium FOT-339	0.0480545	0.00495576	0.00201637	0.387324	0.031 (0.011, 0.092)	0.158 (0.117, 0.214)	0.198 (0.131, 0.3)	0.198354	0.158398	0.79856
OTU5191 Fretibacterium sp. FOT-215	0.0480545	0.100558	<0.001	0.00254991	0.537 (0.27, 1.066)	1.01 (0.734, 1.387)	2.084 (1.487, 2.914)	0.531683	0.257649	0.484591
OTU1062 Fusobacterium sp. FOT-120	0.0587705	0.0583428	0.00156537	0.0358273	3.437 (2.434, 4.834)	2.251 (1.715, 2.95)	1.122 (0.62, 2.023)	1.5269	3.0629	2.00596
OTU3608 Brachymonas sp. COT-015	0.0587705	0.249839	<0.001	<0.001	0.03 (0.015, 0.059)	0.047 (0.033, 0.066)	0.112 (0.079, 0.158)	0.637881	0.265238	0.41581
OTU7786 Clostridiales bacterium	0.0637458	0.0616422	<0.001	0.0125442	0.022 (0.012, 0.038)	0.04 (0.03, 0.052)	0.068 (0.049, 0.093)	0.543851	0.318407	0.585468
OTU2453 Neisseria shayeganii FOT-076	0.074716	0.0322557	0.00154751	0.0221716	0.469 (0.305, 0.723)	0.251 (0.172, 0.365)	0.057 (0.017, 0.19)	1.87343	8.29342	4.42687
OTU450 Candidatus Saccharimonas	0.0832945	0.431334	<0.001	<0.001	0.019 (0.008, 0.048)	0.029 (0.018, 0.047)	0.114 (0.079, 0.165)	0.6604	0.167322	0.253365
OTU9199 Peptostreptococcaceae bacterium COT-124	0.0832945	0.459913	0.00403415	0.00245176	0.057 (0.034, 0.095)	0.071 (0.053, 0.095)	0.141 (0.102, 0.194)	0.799405	0.402664	0.503704
OTU7495 Parvimonas sp. FOT-132	0.0931243	0.0674364	0.0158562	<0.001	0.198 (0.091, 0.43)	0.068 (0.029, 0.158)	0.596 (0.385, 0.92)	2.92443	0.332178	0.113587
OTU5902 Moraxella sp. FOT-089	0.0948218	0.00166577	<0.001	0.0941317	0.155 (0.104, 0.232)	0.061 (0.04, 0.092)	0.025 (0.009, 0.066)	2.54651	6.29458	2.47184
OTU8213 Cardiobacterium sp. FOT-346	0.0948218	0.0902403	<0.001	0.0113085	0.093 (0.063, 0.138)	0.06 (0.044, 0.083)	0.018 (0.008, 0.043)	1.54309	5.1518	3.33862
OTU2476 Lautropia sp. COT-175	0.101738	0.772005	0.00559517	0.00593204	1.757 (1.072, 2.866)	1.611 (1.161, 2.232)	0.249 (0.069, 0.893)	1.09021	7.06268	6.4783
OTU2489 Porphyromonas macacae FOT-332	0.101738	0.0542871	0.0587853	<0.001	0.1 (0.052, 0.193)	0.04 (0.02, 0.078)	0.214 (0.138, 0.334)	2.52515	0.465203	0.184228
OTU8729 Peptostreptococcaceae XI [G-4] bacterium FOT-065	0.104993	0.0224106	0.00116209	0.0548942	0.49 (0.235, 1.018)	1.231 (0.918, 1.649)	1.933 (1.353, 2.756)	0.397831	0.253281	0.636656
OTU2615 Actinomyces sp. COT-404	0.106083	0.301209	0.0797094	0.00131469	0.999 (0.647, 1.54)	0.754 (0.548, 1.037)	1.625 (1.166, 2.26)	1.32536	0.615007	0.464029
OTU8495 Treponema sp. FOT-206	0.106083	0.142555	0.00187497	0.00114206	0.018 (0.006, 0.057)	0.045 (0.028, 0.072)	0.129 (0.085, 0.195)	0.397122	0.138873	0.349699
OTU4067 Moraxella sp. FOT-163	0.111961	0.0174756	0.00285191	0.0473979	0.753 (0.475, 1.193)	0.349 (0.227, 0.537)	0.083 (0.021, 0.321)	2.15613	9.06096	4.20241
OTU9164 Moraxella sp. FOT-163	0.111961	0.00348533	<0.001	0.0755428	0.076 (0.053, 0.11)	0.036 (0.026, 0.05)	0.017 (0.008, 0.036)	2.12137	4.49409	2.11849
OTU7692 Moraxella sp. FOT-089	0.114742	0.247742	0.00620917	0.0190758	2.343 (1.414, 3.858)	1.616 (1.097, 2.374)	0.246 (0.054, 1.125)	1.44988	9.50795	6.55774
OTU6760 Treponema sp. COT-356	0.117426	0.878552	0.0138919	<0.001	0.421 (0.255, 0.694)	0.402 (0.29, 0.557)	0.9 (0.645, 1.254)	1.04712	0.467826	0.446772
OTU6035 Peptostreptococcaceae bacterium COT-303	0.12048	0.00633943	0.153059	0.103767	0.059 (0.024, 0.143)	0.219 (0.163, 0.293)	0.127 (0.071, 0.229)	0.269612	0.463192	1.718
OTU7982 Chloroflexi bacterium COT-408	0.12048	0.420542	0.00119608	<0.001	0.02 (0.007, 0.054)	0.031 (0.019, 0.052)	0.123 (0.083, 0.183)	0.628061	0.158599	0.252522
OTU8401 Bibersteinia sp.	0.12048	0.0193662	0.00184952	0.0428183	0.125 (0.081, 0.193)	0.062 (0.042, 0.092)	0.018 (0.006, 0.056)	2.01917	6.76268	3.34924
OTU794 Actinomyces sp. COT-404	0.122894	<0.001	0.00175229	0.511821	0.094 (0.063, 0.138)	0.031 (0.02, 0.048)	0.023 (0.011, 0.05)	3.02555	4.05332	1.33969
OTU2511 Bacteroidia bacterium COT-387	0.123242	0.42196	0.00351306	0.00141526	0.168 (0.081, 0.35)	0.236 (0.159, 0.35)	0.586 (0.4, 0.859)	0.712732	0.286729	0.402296
OTU8129 Neisseria zoodegmatis FOT-353	0.123242	<0.001	0.00553495	0.228709	0.391 (0.242, 0.632)	0.081 (0.041, 0.158)	0.023 (0.003, 0.158)	4.85009	16.6577	3.43452
OTU1500 Chlorobi [G] bacterium FOT-101	0.131807	0.00712417	0.142027	0.13438	0.532 (0.227, 1.246)	1.846 (1.382, 2.464)	1.141 (0.648, 2.002)	0.288372	0.466764	1.61862
OTU6986 Alloprevotella sp. FOT-167	0.131807	<0.001	0.0017883	0.189645	1.699 (1.099, 2.617)	0.518 (0.312, 0.858)	0.219 (0.066, 0.719)	3.28056	7.75521	2.36399
OTU8764 Treponema sp. COT-249	0.135864	0.723384	0.0156184	0.0045195	0.714 (0.364, 1.395)	0.821 (0.551, 1.222)	1.881 (1.258, 2.803)	0.869787	0.379576	0.436401
OTU9009 Ottowia sp. COT-014	0.135864	0.721366	0.0118419	0.00363396	0.096 (0.06, 0.155)	0.106 (0.08, 0.142)	0.026 (0.011, 0.063)	0.904845	3.66965	4.05555
OTU731 SR1 bacterium COT-380	0.139522	0.437023	0.00300306	0.00674054	0.188 (0.122, 0.29)	0.153 (0.112, 0.207)	0.039 (0.015, 0.099)	1.23249	4.83662	3.92426
OTU1473 Moraxella sp. FOT-087	0.139522	0.182357	0.00441243	0.0240525	3.185 (2.011, 5.009)	2.152 (1.507, 3.065)	0.623 (0.225, 1.715)	1.48005	5.11295	3.45459
OTU4874 Clostridiales bacterium COT-100	0.139522	0.0294726	0.00437951	0.193046	0.026 (0.015, 0.046)	0.052 (0.04, 0.067)	0.069 (0.049, 0.096)	0.502445	0.380173	0.756647
OTU5762 Treponema sp. FOT-211	0.139522	0.0556537	0.00435268	0.0608333	0.05 (0.019, 0.128)	0.133 (0.093, 0.193)	0.229 (0.149, 0.351)	0.372016	0.217167	0.583759
OTU9316 Moraxella sp. FOT-163	0.141303	0.0106823	0.00844808	0.0737845	0.445 (0.269, 0.735)	0.173 (0.104, 0.289)	0.025 (0.003, 0.197)	2.56449	17.7799	6.93309
OTU6119 Xanthomonadaceae [G] bacterium FOT-091	0.142791	0.336121	0.0371096	0.0098276	0.217 (0.112, 0.421)	0.313 (0.221, 0.444)	0.031 (0.006, 0.17)	0.694667	7.05785	10.1601
OTU7234 Pasteurella sp. FOT-354	0.142791	<0.001	0.00812717	0.464115	0.131 (0.088, 0.194)	0.035 (0.021, 0.057)	0.047 (0.025, 0.089)	3.7445	2.78208	0.742977
OTU8703 Desulfomicrobium sp. FOT-093	0.142791	0.0684101	0.358573	0.00694605	0.452 (0.279, 0.73)	0.743 (0.586, 0.941)	0.321 (0.185, 0.559)	0.608505	1.40559	2.3099
OTU8008 Helcococcus sp. FOT-023	0.15148	0.815531	0.0246672	0.00681175	0.407 (0.212, 0.782)	0.445 (0.299, 0.663)	0.987 (0.656, 1.483)	0.913903	0.412552	0.451418
OTU3778 SR1 bacterium	0.163421	0.898714	0.0128094	0.00749441	0.138 (0.081, 0.236)	0.144 (0.103, 0.201)	0.025 (0.007, 0.085)	0.960301	5.60068	5.83222
OTU6168 Ruminococcaceae bacterium	0.168191	0.7341	0.0046191	<0.001	0.022 (0.004, 0.128)	0.031 (0.012, 0.08)	0.312 (0.198, 0.491)	0.712117	0.0717065	0.100695
OTU4534 Cardiobacterium sp. COT-238	0.176229	0.312126	0.0073694	0.0277049	0.129 (0.088, 0.188)	0.101 (0.077, 0.133)	0.048 (0.026, 0.088)	1.27067	2.69459	2.1206
OTU9396 Bacteroidetes bacterium FOT-115	0.184066	0.135015	0.00267643	0.00835065	0.019 (0.008, 0.043)	0.037 (0.026, 0.054)	0.078 (0.053, 0.116)	0.501134	0.239598	0.478111
OTU1013 Capnocytophaga canimorsus	0.188404	<0.001	0.00166368	0.450977	0.19 (0.123, 0.293)	0.036 (0.019, 0.069)	0.021 (0.006, 0.075)	5.21454	8.9587	1.71802
OTU3829 Odoribacter denticanis	0.195902	0.129811	0.00773421	0.0346212	0.041 (0.015, 0.109)	0.093 (0.061, 0.14)	0.18 (0.114, 0.283)	0.440033	0.226415	0.51454
OTU6770 Treponema sp. FOT-144	0.200799	0.108627	0.00446508	0.0228511	0.024 (0.01, 0.06)	0.054 (0.037, 0.08)	0.105 (0.069, 0.161)	0.444836	0.227679	0.511826
OTU8046 Leptotrichia sp. COT-294	0.204736	0.0332023	0.00676231	0.0826422	0.5 (0.302, 0.829)	0.236 (0.148, 0.377)	0.067 (0.017, 0.258)	2.118	7.51174	3.54661
OTU473 Helcococcus sp. COT-140	0.205948	0.0274688	0.0260788	0.837098	0.15 (0.02, 1.127)	1.523 (1.019, 2.269)	1.64 (0.906, 2.948)	0.0986405	0.0916092	0.928718
OTU1871 Stenotrophomonas sp. COT-224	0.205948	0.614207	0.0196549	0.0273905	0.46 (0.254, 0.833)	0.383 (0.253, 0.579)	0.044 (0.007, 0.286)	1.20247	10.5829	8.80097
OTU5531 Porphyromonas sp. FOT-107	0.205948	0.214348	0.27332	0.0200645	0.466 (0.276, 0.784)	0.675 (0.512, 0.889)	0.295 (0.155, 0.558)	0.689691	1.5812	2.29263
OTU6284 Corynebacterium sp.	0.205948	0.0171838	0.76878	0.0238574	0.053 (0.019, 0.142)	0.189 (0.135, 0.263)	0.064 (0.027, 0.153)	0.278129	0.821681	2.95431
OTU7080 Frigovirgula sp. COT-007	0.205948	<0.001	0.00182854	0.514407	0.153 (0.1, 0.233)	0.019 (0.009, 0.041)	0.028 (0.011, 0.074)	7.99458	5.35823	0.670233
OTU7941 TM7 bacterium COT-251	0.205948	0.702522	0.0125977	0.00442678	0.032 (0.019, 0.053)	0.036 (0.027, 0.049)	0.07 (0.05, 0.098)	0.892083	0.458954	0.514475
OTU2819 Erysipelotrichales bacterium	0.21244	0.846819	0.00171223	<0.001	0.019 (0.006, 0.058)	0.017 (0.008, 0.036)	0.131 (0.087, 0.198)	1.13951	0.145735	0.127892
OTU4635 Conchiformibius sp.	0.213034	0.46651	0.0119003	0.0237417	0.152 (0.089, 0.259)	0.12 (0.082, 0.175)	0.027 (0.008, 0.092)	1.27221	5.6493	4.44056
OTU838 Candidatus Saccharimonas	0.217532	0.0240884	0.215962	0.330401	0.053 (0.036, 0.08)	0.089 (0.073, 0.109)	0.074 (0.053, 0.103)	0.596614	0.721425	1.2092
OTU3469 Erysipelotrichaceae bacterium COT-302	0.217532	0.0506511	0.0164524	0.355511	0.055 (0.027, 0.113)	0.12 (0.088, 0.163)	0.153 (0.101, 0.232)	0.45859	0.359554	0.784043
OTU8305 Leucobacter sp. COT-429	0.217532	0.0121905	0.0972137	0.259602	0.032 (0.011, 0.094)	0.136 (0.098, 0.189)	0.091 (0.049, 0.169)	0.236235	0.352452	1.49196
OTU4039 Capnocytophaga sp. FOT-116	0.22633	<0.001	0.00360415	0.952206	0.066 (0.043, 0.1)	0.016 (0.01, 0.028)	0.017 (0.008, 0.038)	4.00624	3.893	0.971732
OTU290 Porphyromonadaceae bacterium COT-184	0.232576	0.180145	0.0104473	0.0682842	0.541 (0.357, 0.821)	0.379 (0.276, 0.521)	0.187 (0.094, 0.373)	1.42817	2.89359	2.02608
OTU2636 Chlorobi bacterium COT-312	0.232576	0.0205648	0.928131	0.0146496	0.029 (0.015, 0.057)	0.068 (0.052, 0.09)	0.028 (0.015, 0.054)	0.429049	1.04287	2.43066
OTU8950 Alphaproteobacteria bacterium COT-081	0.235604	0.0687406	0.00772236	0.0911898	0.026 (0.009, 0.07)	0.069 (0.047, 0.102)	0.116 (0.074, 0.184)	0.36919	0.220574	0.597454
OTU1976 Aquaspirillum sp. FOT-080	0.244109	0.0319579	0.00896396	0.130998	2.743 (1.636, 4.563)	1.262 (0.775, 2.047)	0.455 (0.132, 1.564)	2.17392	6.02145	2.76986
OTU4916 Moraxella sp. COT-017	0.244109	0.0327203	0.00881537	0.195037	0.749 (0.482, 1.163)	0.395 (0.269, 0.581)	0.222 (0.101, 0.488)	1.89541	3.37365	1.7799
OTU2944 Tessaracoccus sp.	0.246938	<0.001	0.00333315	0.595622	0.123 (0.08, 0.188)	0.036 (0.022, 0.06)	0.028 (0.011, 0.067)	3.36853	4.42078	1.31238
OTU4474 Schwartzia sp. FOT-014	0.252433	0.19978	0.0225795	0.125926	0.051 (0.033, 0.08)	0.071 (0.056, 0.091)	0.097 (0.071, 0.133)	0.719626	0.528681	0.734661
OTU7997 Pasteurella pneumotropica FOT-355	0.252433	<0.001	0.00456018	0.991263	0.134 (0.086, 0.207)	0.032 (0.018, 0.057)	0.032 (0.014, 0.077)	4.13847	4.12873	0.997645
OTU3717 Pasteurellaceae sp. COT-080	0.252719	0.429249	0.0126674	0.0260589	0.2 (0.116, 0.347)	0.153 (0.102, 0.228)	0.027 (0.006, 0.117)	1.31263	7.32762	5.5824
OTU9326 Treponema sp. COT-201	0.252719	0.273506	0.00840711	0.0115113	0.038 (0.016, 0.093)	0.066 (0.043, 0.102)	0.148 (0.095, 0.23)	0.576826	0.258831	0.448715
OTU906 Clostridiales [F-1][G-2] bacterium FOT-072	0.260295	0.0310356	0.0292718	0.77676	0.668 (0.271, 1.633)	1.914 (1.368, 2.672)	2.084 (1.273, 3.393)	0.348848	0.320411	0.918484
OTU9519 Petrimonas sp. FOT-112	0.260363	0.202663	0.00745264	0.026246	0.04 (0.021, 0.077)	0.064 (0.047, 0.089)	0.113 (0.078, 0.165)	0.626095	0.356046	0.568676
OTU1427 Actinomyces sp. FOT-321	0.26043	0.0592312	0.86179	0.0797007	0.5 (0.317, 0.789)	0.816 (0.65, 1.023)	0.528 (0.343, 0.813)	0.612758	0.946379	1.54446
OTU589 Desulfovibrionales [G] bacterium FOT-094	0.272513	0.100291	0.0101207	0.058679	0.107 (0.033, 0.348)	0.307 (0.197, 0.478)	0.581 (0.355, 0.949)	0.347595	0.183583	0.52815
OTU7122 Flavobacteriales bacterium	0.272513	0.177674	0.00753937	0.0430874	0.318 (0.199, 0.51)	0.211 (0.146, 0.306)	0.073 (0.028, 0.191)	1.50614	4.35186	2.88942
OTU2258 Pasteurella multocida	0.274778	0.84099	0.022152	0.0110815	0.332 (0.19, 0.578)	0.354 (0.252, 0.499)	0.075 (0.024, 0.235)	0.936125	4.39666	4.69666
OTU2349 Stenotrophomonas sp. FOT-090	0.274778	0.0237843	0.04844	0.136531	1.429 (0.807, 2.519)	0.556 (0.31, 0.994)	0.032 (0.001, 1.332)	2.56961	45.26	17.6136
OTU2488 Comamonas sp. COT-270	0.297737	0.528944	0.0730096	0.0193204	0.222 (0.117, 0.421)	0.281 (0.196, 0.403)	0.069 (0.022, 0.21)	0.791936	3.24336	4.09548
OTU5108 Porphyromonas sp.	0.297737	0.265789	0.0133075	0.0402234	0.405 (0.232, 0.705)	0.272 (0.177, 0.418)	0.054 (0.012, 0.238)	1.48606	7.50724	5.05178
OTU8255 Peptostreptococcaceae XIII [G-1] bacterium FOT-028	0.306634	0.0568365	0.0177882	0.211266	0.553 (0.098, 3.049)	3.085 (1.941, 4.87)	4.884 (2.777, 8.452)	0.179262	0.11321	0.631537
OTU6315 Proprionivibrio sp. FOT-359	0.31538	0.778012	0.0910135	0.0305919	0.07 (0.049, 0.102)	0.075 (0.06, 0.094)	0.042 (0.027, 0.067)	0.940284	1.66294	1.76855
OTU5933 Actinobacillus sp.	0.319479	0.00277593	0.0138893	0.189755	1.653 (0.964, 2.822)	0.437 (0.223, 0.853)	0.094 (0.01, 0.855)	3.78404	17.5981	4.65061
OTU922 Bacteroidetes bacterium FOT-309	0.336325	0.293947	0.0132901	0.0459295	0.134 (0.081, 0.223)	0.096 (0.066, 0.14)	0.032 (0.012, 0.088)	1.39981	4.20397	3.00324
OTU4788 TM7 bacterium COT-251	0.336325	0.171969	0.0215545	0.13941	0.142 (0.085, 0.238)	0.213 (0.163, 0.278)	0.295 (0.209, 0.418)	0.668529	0.481112	0.719657
OTU3648 Lampropedia sp.	0.344541	0.0318875	0.00972042	0.0952547	0.197 (0.115, 0.336)	0.087 (0.052, 0.145)	0.021 (0.004, 0.104)	2.25369	9.28551	4.12014
OTU1872 Moraxella sp. COT-396	0.356976	0.643257	0.054702	0.0257253	0.112 (0.055, 0.224)	0.135 (0.09, 0.203)	0.019 (0.004, 0.101)	0.827579	5.91434	7.14655
OTU3368 Flavobacteriaceae bacterium	0.356976	0.0054623	0.00297859	0.129529	0.112 (0.071, 0.176)	0.044 (0.028, 0.07)	0.017 (0.006, 0.053)	2.52835	6.43813	2.54637
OTU5200 Actinobacteria [G] bacterium FOT-117	0.356976	0.0746851	0.70691	0.145299	0.126 (0.066, 0.242)	0.242 (0.179, 0.326)	0.149 (0.083, 0.267)	0.521515	0.846978	1.62407
OTU9407 Treponema sp. FOT-207	0.356976	0.874158	0.0746768	0.0340944	0.297 (0.167, 0.528)	0.313 (0.219, 0.447)	0.563 (0.375, 0.845)	0.947351	0.527232	0.556533
OTU8164 Capnocytophaga sp. FOT-168	0.358382	<0.001	0.0150646	0.332917	0.944 (0.567, 1.57)	0.135 (0.057, 0.321)	0.035 (0.003, 0.469)	7.00588	26.666	3.80623
OTU2699 Granulicatella sp. COT-095	0.361857	0.243534	0.198986	0.0301762	0.141 (0.06, 0.329)	0.246 (0.163, 0.37)	0.048 (0.012, 0.198)	0.573111	2.92676	5.1068
OTU4206 Moraxella sp. COT-328	0.363203	<0.001	0.00178768	0.865306	0.116 (0.075, 0.179)	0.019 (0.01, 0.038)	0.017 (0.006, 0.051)	6.12873	6.84881	1.11749
OTU3633 Catonella sp. FOT-011	0.364528	0.0070982	0.00435822	0.227875	0.595 (0.384, 0.919)	0.255 (0.167, 0.391)	0.141 (0.059, 0.338)	2.32805	4.22087	1.81305
OTU927 Microbacteriaceae bacterium	0.365089	0.00973174	0.00632996	0.106885	0.224 (0.135, 0.371)	0.085 (0.051, 0.144)	0.022 (0.005, 0.106)	2.62576	10.2026	3.88556
OTU4882 Treponema sp. FOT-205	0.365089	0.109747	0.0334966	0.338504	0.094 (0.053, 0.168)	0.159 (0.12, 0.211)	0.2 (0.136, 0.294)	0.594579	0.471781	0.793471
OTU2079 Porphyromonadaceae bacterium	0.36637	<0.001	0.00865162	0.63589	0.306 (0.181, 0.517)	0.057 (0.026, 0.124)	0.038 (0.009, 0.163)	5.37492	7.95147	1.47937
OTU883 Peptostreptococcaceae XI [G-1] bacterium FOT-040	0.373626	0.0907087	0.762435	0.159573	0.684 (0.429, 1.087)	1.071 (0.845, 1.356)	0.753 (0.489, 1.16)	0.638707	0.907734	1.42121
OTU163 Porphyromonas sp. COT-181	0.400607	0.036471	0.0778325	0.761948	0.064 (0.022, 0.187)	0.216 (0.149, 0.313)	0.194 (0.106, 0.354)	0.298062	0.332155	1.11438
OTU3989 Treponema sp. FOT-201	0.417347	0.301484	0.0605539	0.206564	1.509 (0.921, 2.462)	2.023 (1.542, 2.652)	2.699 (1.883, 3.855)	0.745705	0.559001	0.749627
OTU7447 Treponema sp. FOT-212	0.41821	0.533859	0.0478631	0.0567243	0.112 (0.06, 0.207)	0.14 (0.099, 0.199)	0.237 (0.157, 0.357)	0.800085	0.472802	0.59094
OTU1524 Neisseria zoodegmatis	0.419059	0.144982	0.0359734	0.234927	0.595 (0.359, 0.984)	0.368 (0.244, 0.554)	0.211 (0.093, 0.481)	1.61804	2.81377	1.739
OTU3057 Prevotella sp. COT-282	0.419897	0.0389605	0.0548603	0.716887	0.215 (0.138, 0.336)	0.116 (0.078, 0.17)	0.101 (0.054, 0.19)	1.86355	2.1349	1.14561
OTU1709 Globicatella sp. COT-107	0.424547	0.14055	0.0141468	0.0683742	0.026 (0.009, 0.075)	0.061 (0.039, 0.094)	0.112 (0.069, 0.184)	0.426605	0.231749	0.543241
OTU2931 Tannerella forsythia FOT-307	0.426874	0.062474	0.0494957	0.574506	0.841 (0.592, 1.195)	0.55 (0.417, 0.726)	0.473 (0.3, 0.745)	1.52999	1.77969	1.1632
OTU4774 Erysipelotrichaceae bacterium	0.426874	0.0385393	0.0393748	0.852192	0.064 (0.019, 0.221)	0.253 (0.17, 0.375)	0.27 (0.151, 0.482)	0.254548	0.238296	0.936153
OTU6787 Porphyromonas sp. COT-290	0.426874	0.237978	0.0434405	0.201669	1.338 (0.908, 1.966)	1.005 (0.757, 1.332)	0.682 (0.402, 1.155)	1.33148	1.96076	1.47262
OTU5748 Fusobacterium sp.	0.427628	0.0250363	0.300011	0.323055	0.868 (0.538, 1.398)	0.411 (0.264, 0.64)	0.589 (0.334, 1.035)	2.1108	1.47408	0.698352
OTU3289 Brachymonas sp.	0.43644	0.289656	0.322983	0.0212937	0.046 (0.029, 0.073)	0.034 (0.024, 0.048)	0.062 (0.042, 0.091)	1.35654	0.74212	0.547067
OTU8388 SR1 [G] bacterium FOT-313	0.43644	0.0909095	0.0591975	0.610726	0.444 (0.278, 0.709)	0.697 (0.55, 0.884)	0.777 (0.55, 1.095)	0.636777	0.571927	0.898158
OTU3020 Tessaracoccus sp.	0.438935	0.00230174	0.00901561	0.59538	0.099 (0.061, 0.159)	0.032 (0.019, 0.054)	0.024 (0.009, 0.061)	3.09762	4.14417	1.33786
OTU4392 Erysipelotrichaceae [G] bacterium FOT-121	0.441396	0.230611	0.0621097	0.290371	0.488 (0.313, 0.761)	0.664 (0.521, 0.845)	0.827 (0.593, 1.152)	0.735393	0.590211	0.802578
OTU2378 Treponema sp. COT-397	0.452131	0.439175	0.0407781	0.0616788	0.035 (0.017, 0.071)	0.048 (0.032, 0.071)	0.084 (0.054, 0.132)	0.724842	0.410389	0.566178
OTU5217 Clostridiales bacterium COT-142	0.452131	0.583368	0.0305107	0.0223914	0.075 (0.037, 0.151)	0.094 (0.063, 0.14)	0.186 (0.121, 0.287)	0.799701	0.40197	0.50265
OTU6282 Porphyromonas gulae FOT-105	0.452131	0.196805	0.0572939	0.301169	0.965 (0.47, 1.968)	1.624 (1.143, 2.302)	2.197 (1.386, 3.467)	0.594059	0.439098	0.73915
OTU1393 Neisseria sp. FOT-352	0.45444	0.138308	0.0198659	0.139774	0.074 (0.045, 0.121)	0.046 (0.031, 0.068)	0.022 (0.009, 0.053)	1.61011	3.29968	2.04935
OTU723 Propionibacterium sp. FOT-327	0.460906	0.040201	0.503028	0.132317	0.065 (0.029, 0.146)	0.163 (0.117, 0.226)	0.092 (0.048, 0.179)	0.397981	0.700496	1.76012
OTU1821 Brachymonas sp. clone TF133 feline oral taxon 073	0.460906	0.13529	0.0772254	0.559858	0.444 (0.262, 0.751)	0.695 (0.531, 0.907)	0.797 (0.544, 1.167)	0.638756	0.556772	0.871651
OTU4125 Leucobacter sp.FOT-324	0.460906	0.099679	0.983498	0.0889752	0.163 (0.078, 0.342)	0.322 (0.231, 0.451)	0.162 (0.078, 0.333)	0.506211	1.00952	1.99427
OTU4478 Streptococcus sp. FOT-345	0.460906	0.0421743	0.0787072	0.879195	0.055 (0.025, 0.121)	0.133 (0.096, 0.184)	0.127 (0.077, 0.21)	0.413185	0.432555	1.04688
OTU6654 Flavobacteriaceae bacterium	0.460906	<0.001	0.00297127	0.567262	0.134 (0.085, 0.213)	0.027 (0.014, 0.052)	0.018 (0.005, 0.061)	4.97617	7.42405	1.49192
OTU8286 Flavobacteriaceae bacterium	0.460906	0.0640638	0.956861	0.0522695	0.042 (0.02, 0.085)	0.086 (0.063, 0.118)	0.04 (0.02, 0.081)	0.480466	1.02715	2.13781
OTU7912 Aquaspirillum sp. FOT-079	0.464743	0.0329872	0.723445	0.0510784	0.017 (0.006, 0.05)	0.058 (0.04, 0.084)	0.022 (0.008, 0.055)	0.285596	0.774136	2.7106
OTU468 Actinobacteria bacterium COT-376	0.467284	0.0430928	0.183291	0.477497	0.153 (0.069, 0.34)	0.373 (0.269, 0.515)	0.296 (0.169, 0.516)	0.411801	0.519041	1.26042
OTU2914 Peptostreptococcaceae bacterium COT-096	0.467284	0.576235	0.282033	0.0831786	0.195 (0.122, 0.313)	0.228 (0.172, 0.302)	0.131 (0.074, 0.23)	0.856597	1.493	1.74294
OTU6321 Desulfobulbus sp.	0.482579	0.51445	0.212505	0.0496452	0.06 (0.035, 0.103)	0.074 (0.054, 0.101)	0.035 (0.017, 0.069)	0.81515	1.73876	2.13306
OTU5758 Lachnospiraceae XIVa [G-6] bacterium FOT-001	0.484857	0.359757	0.565836	0.116543	0.107 (0.074, 0.153)	0.129 (0.105, 0.159)	0.092 (0.063, 0.134)	0.82433	1.16398	1.41203
OTU7570 Pseudoclavibacter sp. FOT-328	0.484857	0.209355	0.221259	0.0175747	0.057 (0.03, 0.107)	0.089 (0.065, 0.123)	0.03 (0.013, 0.069)	0.638779	1.92247	3.00959
OTU7170 Clostridiales IV [G-1] bacterium FOT-118	0.498144	0.129544	0.781452	0.0733109	0.159 (0.071, 0.355)	0.313 (0.218, 0.451)	0.135 (0.057, 0.315)	0.506548	1.1782	2.32595
OTU6848 Fretibacterium sp. FOT-218	0.499982	0.11372	0.0923105	0.721301	0.21 (0.108, 0.409)	0.38 (0.277, 0.52)	0.42 (0.266, 0.663)	0.553718	0.501057	0.904896
OTU5633 Propionibacterium sp. COT-321	0.503401	0.615275	0.179968	0.0599811	0.51 (0.266, 0.975)	0.617 (0.424, 0.898)	0.236 (0.093, 0.598)	0.826756	2.16484	2.61848
OTU1367 Xanthomonadaceae bacterium	0.503592	0.0129932	0.0556345	0.198956	0.647 (0.351, 1.187)	0.197 (0.097, 0.398)	0.017 (0, 0.672)	3.28938	37.3189	11.3453
OTU696 Porphyromonas sp.	0.522791	0.145841	0.757436	0.0787421	0.204 (0.09, 0.465)	0.398 (0.274, 0.578)	0.169 (0.07, 0.408)	0.513408	1.20635	2.34969
OTU2353 Porphyromonas sp. COT-366	0.532333	0.169957	0.315941	0.0257648	0.107 (0.051, 0.227)	0.191 (0.134, 0.273)	0.057 (0.021, 0.155)	0.561359	1.8861	3.35987
OTU7174 Bacteroidia bacterium FOT-310	0.532333	0.124877	0.0432335	0.321125	0.124 (0.079, 0.194)	0.079 (0.055, 0.113)	0.054 (0.028, 0.105)	1.5695	2.29597	1.46287
OTU6751 Prevotella sp. COT-284	0.537021	0.604966	0.0972532	0.0302598	0.51 (0.269, 0.963)	0.618 (0.427, 0.892)	0.182 (0.065, 0.515)	0.825208	2.79286	3.38443
OTU5730 Porphyromonas sp.	0.540081	0.437121	0.0541024	0.128833	0.09 (0.058, 0.138)	0.073 (0.054, 0.099)	0.043 (0.024, 0.079)	1.2309	2.07695	1.68734
OTU6136 Bacteroidales bacterium	0.540081	0.156234	0.0568466	0.359284	0.068 (0.047, 0.099)	0.049 (0.037, 0.064)	0.037 (0.023, 0.061)	1.4	1.82045	1.30032
OTU3078 Actinomycetaceae bacterium	0.541549	0.240081	0.0482984	0.212311	0.538 (0.34, 0.85)	0.382 (0.271, 0.54)	0.237 (0.121, 0.464)	1.40736	2.2692	1.61238
OTU6183 Peptostreptococcaceae XI [G-3] bacterium FOT-061	0.541549	0.089647	0.176629	0.817739	0.208 (0.108, 0.399)	0.387 (0.286, 0.524)	0.362 (0.224, 0.585)	0.537515	0.574186	1.06822
OTU5332 Moraxella sp.	0.549078	0.445557	0.345329	0.0826538	0.112 (0.059, 0.215)	0.149 (0.105, 0.214)	0.069 (0.031, 0.154)	0.751701	1.6395	2.18105
OTU1979 TM7 bacterium COT-305	0.575624	0.17503	0.686753	0.34444	0.199 (0.122, 0.326)	0.292 (0.226, 0.378)	0.228 (0.146, 0.357)	0.683049	0.8737	1.27912
OTU5654 Microbacteriaceae bacterium	0.575624	0.304472	0.149724	0.0249464	0.054 (0.025, 0.115)	0.084 (0.057, 0.123)	0.018 (0.005, 0.065)	0.641294	2.9696	4.63063
OTU8339 Prevotella sp. COT-226	0.575624	0.913096	0.075559	0.0466783	0.38 (0.2, 0.719)	0.396 (0.265, 0.591)	0.118 (0.038, 0.363)	0.959498	3.22433	3.36043
OTU516 Peptostreptococcaceae XI [G-4] bacterium FOT-071	0.578125	0.105805	0.350871	0.51575	0.067 (0.035, 0.127)	0.12 (0.088, 0.163)	0.099 (0.059, 0.165)	0.556338	0.677369	1.21755
OTU8496 Fretibacterium sp. FOT-222	0.578125	0.156328	0.193947	0.954813	0.072 (0.042, 0.126)	0.113 (0.085, 0.15)	0.115 (0.075, 0.176)	0.64074	0.631587	0.985715
OTU1079 Peptostreptococcaceae XI [G-1] bacterium FOT-036	0.580087	0.123439	0.160803	0.966367	1.345 (0.753, 2.39)	2.223 (1.672, 2.95)	2.247 (1.455, 3.456)	0.604771	0.59833	0.989351
OTU1807 Porphyromonas sp. COT-401	0.580087	0.0436429	0.411622	0.0782491	0.02 (0.003, 0.152)	0.17 (0.109, 0.264)	0.054 (0.016, 0.179)	0.119699	0.377627	3.15482
OTU2679 Proteocatella sp. FOT-127	0.580087	0.402926	0.0372303	0.0622883	0.595 (0.278, 1.272)	0.857 (0.572, 1.281)	1.531 (0.966, 2.418)	0.694756	0.388696	0.559472
OTU4828 Corynebacterium canis	0.580087	0.0396852	0.0804663	0.505442	0.02 (0.002, 0.186)	0.218 (0.142, 0.335)	0.162 (0.076, 0.347)	0.0896552	0.120268	1.34145
OTU5251 Capnocytophaga sp. FOT-116	0.58128	0.460362	0.0344689	0.0675825	0.105 (0.056, 0.198)	0.078 (0.049, 0.125)	0.018 (0.004, 0.081)	1.34322	5.68329	4.23108
OTU3475 Globicatella sp. FOT-122	0.581965	0.195659	0.122348	0.539343	0.468 (0.287, 0.761)	0.312 (0.213, 0.456)	0.246 (0.128, 0.474)	1.50104	1.89829	1.26465
OTU5195 Spirochaeta sp. COT-314	0.581965	0.221076	0.10412	0.474991	0.046 (0.026, 0.081)	0.068 (0.051, 0.092)	0.082 (0.054, 0.124)	0.669005	0.555977	0.83105
OTU8417 Actinomyces sp.	0.581965	0.846459	0.125444	0.117109	0.072 (0.046, 0.114)	0.068 (0.051, 0.092)	0.04 (0.022, 0.073)	1.05479	1.7997	1.70622
OTU1191 Desulfovibrio sp. FOT-347	0.588731	0.881307	0.206755	0.0833746	0.261 (0.148, 0.459)	0.248 (0.171, 0.36)	0.413 (0.265, 0.642)	1.05224	0.631868	0.6005
OTU1548 Actinomycetaceae bacterium	0.610374	0.0724307	0.268149	0.466672	0.075 (0.03, 0.189)	0.187 (0.129, 0.271)	0.142 (0.073, 0.273)	0.400552	0.528678	1.31987
OTU8513 Catonella sp. COT-025	0.610374	0.0825113	0.135479	0.904803	0.206 (0.13, 0.325)	0.121 (0.083, 0.178)	0.116 (0.064, 0.211)	1.69453	1.76811	1.04342
OTU9129 Clostridiales bacterium COT-157	0.619648	0.110898	0.189172	0.86013	0.044 (0.02, 0.099)	0.091 (0.063, 0.13)	0.085 (0.049, 0.15)	0.489212	0.519152	1.0612
OTU2425 Filifactor sp. FOT-129	0.621963	0.174827	0.358696	0.73464	0.738 (0.465, 1.171)	1.058 (0.828, 1.351)	0.978 (0.661, 1.444)	0.697884	0.75514	1.08204
OTU3644 Porphyromonas sp. FOT-109	0.622887	0.0940651	0.09542	0.672733	0.146 (0.088, 0.24)	0.083 (0.055, 0.127)	0.07 (0.035, 0.142)	1.74622	2.07986	1.19107
OTU3692 Actinomyces sp.	0.630598	0.351442	0.0415893	0.10003	0.312 (0.166, 0.587)	0.437 (0.311, 0.614)	0.685 (0.452, 1.035)	0.71295	0.45553	0.638937
OTU298 Peptostreptococcaceae XI [G-1] bacterium FOT-035	0.653006	0.300582	0.105694	0.351337	1.281 (0.81, 2.02)	0.951 (0.678, 1.333)	0.685 (0.371, 1.258)	1.34715	1.87149	1.38922
OTU399 Proteocatella sp. FOT-050	0.653006	0.0225228	0.105313	0.803665	0.665 (0.406, 1.088)	0.3 (0.188, 0.48)	0.333 (0.169, 0.657)	2.21541	1.99738	0.901587
OTU3614 Treponema sp. FOT-209	0.653006	0.438006	0.120259	0.253447	0.039 (0.021, 0.074)	0.052 (0.037, 0.074)	0.073 (0.046, 0.114)	0.754339	0.542664	0.71939
OTU4533 Actinomyces sp. FOT-320	0.653006	0.665024	0.0849744	0.0669211	0.8 (0.313, 2.029)	1.012 (0.596, 1.712)	2.077 (1.183, 3.623)	0.790783	0.38511	0.486998
OTU4815 Porphyromonas cangingivalis	0.653006	0.43647	0.144007	0.314295	0.573 (0.326, 1.006)	0.739 (0.539, 1.012)	0.967 (0.633, 1.474)	0.775638	0.592919	0.764427
OTU5057 Conchiformibius sp.	0.653006	0.186812	0.187062	0.0424815	0.166 (0.06, 0.461)	0.351 (0.224, 0.547)	0.031 (0.003, 0.309)	0.474858	5.40573	11.3839
OTU6061 Propionibacterium sp. COT-300	0.653006	0.0921169	0.0932299	0.687879	0.252 (0.163, 0.389)	0.156 (0.11, 0.222)	0.136 (0.077, 0.242)	1.61305	1.84888	1.1462
OTU7829 Corynebacterium sp. COT-402	0.653006	0.291535	0.775068	0.170152	0.629 (0.332, 1.191)	0.925 (0.661, 1.293)	0.551 (0.283, 1.07)	0.680295	1.14233	1.67917
OTU3576 Neisseriaceae bacterium	0.657634	0.185072	0.463467	0.0480491	0.046 (0.021, 0.104)	0.084 (0.058, 0.123)	0.029 (0.011, 0.078)	0.549518	1.60718	2.92471
OTU926 Flavobacteriales bacterium	0.65963	0.21349	0.0536429	0.235932	0.18 (0.102, 0.316)	0.114 (0.072, 0.179)	0.06 (0.023, 0.156)	1.57829	2.97011	1.88185
OTU3022 Synergistales bacterium COT-138	0.661004	0.329455	0.131812	0.396895	0.068 (0.036, 0.127)	0.096 (0.069, 0.134)	0.122 (0.078, 0.192)	0.705965	0.555279	0.786553
OTU9507 Peptostreptococcaceae XI [G-3] bacterium FOT-060	0.661004	0.0487513	0.869792	0.0557758	0.033 (0.01, 0.101)	0.109 (0.073, 0.161)	0.037 (0.013, 0.104)	0.299756	0.88113	2.93949
OTU1276 Aquaspirillum sp. FOT-082	0.662482	0.756197	0.158839	0.0326307	0.104 (0.044, 0.246)	0.088 (0.049, 0.16)	0.218 (0.122, 0.389)	1.17871	0.475531	0.403432
OTU2581 Ruminococcaceae bacterium	0.662482	0.0916432	0.313938	0.495938	0.036 (0.016, 0.082)	0.078 (0.054, 0.11)	0.061 (0.033, 0.112)	0.467295	0.595599	1.27457
OTU2966 Bacteroidetes bacterium FOT-312	0.662482	0.270018	0.609967	0.102007	0.118 (0.062, 0.226)	0.178 (0.127, 0.249)	0.092 (0.045, 0.189)	0.665102	1.28205	1.92759
OTU4704 Corynebacterium sp. FOT-322	0.662482	0.133831	0.729982	0.273806	0.233 (0.138, 0.394)	0.139 (0.09, 0.214)	0.204 (0.118, 0.352)	1.68	1.14115	0.679259
OTU6806 Neisseriaceae bacterium	0.662482	0.0377813	0.198443	0.256132	0.018 (0.004, 0.083)	0.097 (0.064, 0.147)	0.057 (0.024, 0.131)	0.188938	0.323681	1.71316
OTU9067 Arcobacter sp. COT-276	0.662482	0.212685	0.903808	0.24873	0.108 (0.048, 0.244)	0.191 (0.13, 0.282)	0.116 (0.054, 0.249)	0.566105	0.934412	1.6506
OTU8687 Bacteroides sp. COT-040	0.663133	0.0525778	0.899468	0.0408047	0.033 (0.009, 0.121)	0.128 (0.084, 0.195)	0.029 (0.007, 0.112)	0.254947	1.12785	4.42385
OTU6038 Alloprevotella sp. FOT-114	0.669948	0.465939	0.149275	0.0628739	0.333 (0.129, 0.854)	0.492 (0.301, 0.805)	0.056 (0.006, 0.525)	0.675489	5.91685	8.75936
OTU3905 Bacteroidetes bacterium FOT-141	0.670559	0.0944856	0.129341	0.712433	0.016 (0.001, 0.35)	0.23 (0.137, 0.385)	0.19 (0.079, 0.455)	0.0709037	0.0856159	1.20749
OTU1957 Pasteurellaaceae [G-2] bacterium FOT-358	0.671164	0.103857	0.48584	0.0315849	0.039 (0.015, 0.099)	0.09 (0.061, 0.132)	0.023 (0.007, 0.074)	0.436353	1.69177	3.87707
OTU3522 Lachnospiraceae XIVa [G-2] bacterium FOT-008	0.671743	0.381339	0.11711	0.284451	0.139 (0.062, 0.311)	0.208 (0.137, 0.316)	0.3 (0.176, 0.511)	0.669113	0.463608	0.69287
OTU8837 Porphyromonas canoris	0.671743	0.879167	0.299283	0.260177	2.259 (1.417, 3.583)	2.356 (1.762, 3.143)	3.099 (2.108, 4.534)	0.959005	0.729062	0.760228
OTU8957 Fusobacterium sp.	0.671743	0.0700371	0.837908	0.0563989	0.077 (0.014, 0.418)	0.39 (0.242, 0.627)	0.059 (0.009, 0.387)	0.196404	1.29924	6.61511
OTU7292 Actinobacillus sp.	0.691542	0.0614775	0.817596	0.0427098	0.026 (0.007, 0.097)	0.097 (0.063, 0.149)	0.021 (0.005, 0.087)	0.271986	1.2496	4.59436
OTU8322 Moraxella canis	0.713554	0.0660706	0.545409	0.118776	0.031 (0.005, 0.177)	0.168 (0.104, 0.269)	0.059 (0.017, 0.201)	0.184434	0.521812	2.82926
OTU5757 Propionibacterium sp. FOT-325	0.718712	0.106124	0.200824	0.761337	0.066 (0.021, 0.202)	0.177 (0.115, 0.274)	0.156 (0.077, 0.317)	0.372327	0.422943	1.13594
OTU7805 Campylobacterales bacterium	0.72264	0.0557136	0.219983	0.422025	0.038 (0.012, 0.119)	0.124 (0.083, 0.185)	0.089 (0.043, 0.183)	0.308674	0.432137	1.39998
OTU6213 Catonella sp. COT-160	0.726533	0.0423563	0.170479	0.393869	0.021 (0.006, 0.076)	0.085 (0.057, 0.128)	0.059 (0.028, 0.125)	0.243951	0.352452	1.44477
OTU3777 Conchiformibius kuhniae	0.733915	0.12778	0.0375155	0.249397	0.155 (0.089, 0.268)	0.089 (0.056, 0.141)	0.048 (0.018, 0.125)	1.74025	3.24029	1.86196
OTU2099 Wolinella sp. FOT-098	0.738894	0.218583	0.181773	0.753586	0.359 (0.167, 0.768)	0.608 (0.419, 0.882)	0.675 (0.393, 1.156)	0.589476	0.531392	0.901465
OTU2580 Actinomyces bacterium	0.742666	0.865029	0.312045	0.185208	0.105 (0.067, 0.164)	0.109 (0.083, 0.145)	0.074 (0.044, 0.124)	0.955708	1.42274	1.48868
OTU8910 Erysipelotrichaceae bacterium COT-255	0.770744	0.28165	0.769101	0.438702	0.103 (0.061, 0.173)	0.142 (0.107, 0.188)	0.114 (0.071, 0.184)	0.724966	0.900701	1.2424
OTU1129 Peptostreptococcaceae XI [G-2] bacterium FOT-015	0.775737	0.966052	0.254731	0.167188	0.536 (0.316, 0.908)	0.543 (0.389, 0.757)	0.792 (0.518, 1.207)	0.987038	0.676799	0.685687
OTU7270 Peptostreptococcaceae XI [G-5] bacterium FOT-068	0.775737	0.606305	0.676825	0.313989	0.318 (0.228, 0.441)	0.351 (0.288, 0.428)	0.288 (0.205, 0.402)	0.904752	1.10407	1.2203
OTU7402 Actinomyces sp.	0.775737	0.144754	0.859425	0.181433	0.079 (0.029, 0.218)	0.179 (0.116, 0.275)	0.089 (0.035, 0.226)	0.441361	0.884169	2.00328
OTU1223 Pelistega sp.	0.780508	0.956721	0.147614	0.117506	0.075 (0.04, 0.14)	0.073 (0.049, 0.11)	0.033 (0.013, 0.083)	1.02024	2.26225	2.21738
OTU9437 Luteimonas sp. FOT-166	0.780508	0.107029	0.230764	0.90105	0.108 (0.062, 0.19)	0.059 (0.036, 0.096)	0.062 (0.03, 0.128)	1.83236	1.73609	0.947461
OTU1419 Prevotella sp. COT-226	0.781823	0.382655	0.919411	0.316484	0.127 (0.059, 0.277)	0.188 (0.125, 0.282)	0.121 (0.056, 0.261)	0.678992	1.05726	1.5571
OTU2474 Streptococcus minor	0.781823	0.310417	0.268772	0.0167369	0.138 (0.06, 0.318)	0.079 (0.039, 0.159)	0.246 (0.134, 0.45)	1.75386	0.560889	0.319803
OTU8802 Pasteurellaceae bacterium	0.794235	0.571346	0.120308	0.202794	0.205 (0.111, 0.381)	0.165 (0.106, 0.257)	0.084 (0.032, 0.217)	1.2431	2.44532	1.96711
OTU7092 Porphyromonas sp. FOT-110	0.796503	0.312263	0.654573	0.632319	3.212 (2.065, 4.964)	2.429 (1.756, 3.352)	2.783 (1.753, 4.389)	1.32217	1.15432	0.873051
OTU623 Capnocytophaga sp.	0.799864	0.0644278	0.654425	0.107399	0.017 (0.004, 0.068)	0.067 (0.043, 0.104)	0.025 (0.008, 0.076)	0.249734	0.666948	2.67064
OTU5649 Microbacteriaceae bacterium	0.802095	0.736718	0.496332	0.271676	0.074 (0.039, 0.142)	0.085 (0.058, 0.124)	0.053 (0.025, 0.112)	0.880457	1.40215	1.59252
OTU7641 Peptostreptococcaceae XI [G-2] bacterium FOT-017	0.802095	0.28421	0.691525	0.550102	0.933 (0.573, 1.515)	0.671 (0.465, 0.966)	0.81 (0.487, 1.346)	1.39095	1.15129	0.827703
OTU1423 Neisseriaceae bacterium	0.808683	0.102572	0.751432	0.141723	0.154 (0.033, 0.713)	0.587 (0.357, 0.964)	0.212 (0.059, 0.755)	0.26282	0.727293	2.76726
OTU3549 Catonella sp. COT-340	0.825052	0.106378	0.5751	0.254073	0.247 (0.089, 0.69)	0.613 (0.407, 0.924)	0.36 (0.157, 0.822)	0.40368	0.6883	1.70506
OTU1552 Catonella sp. FOT-010	0.839112	0.6888	0.775771	0.460697	0.517 (0.333, 0.803)	0.574 (0.44, 0.748)	0.473 (0.302, 0.739)	0.901391	1.09438	1.21411
OTU9320 Lactobacillales bacterium	0.861729	0.536782	0.671062	0.274969	0.159 (0.081, 0.309)	0.202 (0.138, 0.294)	0.129 (0.062, 0.265)	0.787318	1.23464	1.56816
OTU1564 Synergistales bacterium COT-205	0.873369	0.936468	0.49524	0.354521	0.057 (0.032, 0.104)	0.056 (0.038, 0.082)	0.075 (0.045, 0.124)	1.02859	0.76455	0.7433
OTU1180 Actinomyces sp.	0.878162	0.33383	0.133071	0.380765	0.054 (0.022, 0.129)	0.087 (0.056, 0.134)	0.119 (0.067, 0.211)	0.619415	0.450228	0.726861
OTU6629 Fusobacteriales bacterium	0.878162	0.140482	0.758559	0.2057	0.163 (0.043, 0.612)	0.469 (0.286, 0.769)	0.214 (0.069, 0.656)	0.347707	0.763963	2.19714
OTU5552 Porphyromonadaceae bacterium	0.884263	0.364436	0.163281	0.42116	0.163 (0.088, 0.303)	0.114 (0.071, 0.183)	0.076 (0.031, 0.185)	1.42905	2.15257	1.50629
OTU5856 Peptostreptococcaceae XI [G-10] bacterium FOT-134	0.893503	0.310343	0.384126	0.974509	0.128 (0.065, 0.251)	0.189 (0.133, 0.269)	0.187 (0.109, 0.322)	0.67641	0.683148	1.00996
OTU3903 Bacteroides tectus FOT-336	0.899496	0.363381	0.801628	0.541334	0.169 (0.089, 0.318)	0.117 (0.072, 0.189)	0.15 (0.078, 0.289)	1.44166	1.12243	0.778566
OTU4437 Peptostreptococcaceae bacterium COT-129	0.90504	0.51798	0.612033	0.94638	0.077 (0.039, 0.148)	0.098 (0.067, 0.143)	0.096 (0.054, 0.171)	0.780139	0.798396	1.0234
OTU4928 Actinobacteria bacterium COT-406	0.90504	0.610445	0.800522	0.425528	0.121 (0.055, 0.263)	0.152 (0.097, 0.236)	0.104 (0.046, 0.236)	0.793965	1.15498	1.45469
OTU703 Tissierella sp. FOT-025	0.921376	0.944425	0.734583	0.629652	0.496 (0.33, 0.747)	0.488 (0.375, 0.634)	0.546 (0.373, 0.797)	1.01707	0.908972	0.893712
OTU9414 Lachnospiraceae XIVa [G-2] bacterium FOT-007	0.925083	0.554761	0.345766	0.589417	1.182 (0.692, 2.013)	0.973 (0.668, 1.414)	0.796 (0.421, 1.498)	1.21515	1.48552	1.22249
OTU2518 Sphingobacteriales bacterium	0.931874	0.52493	0.679781	0.887878	0.272 (0.159, 0.466)	0.22 (0.151, 0.323)	0.231 (0.131, 0.408)	1.23559	1.17701	0.952589
OTU2159 Actinobacteria bacterium COT-406	0.941715	0.615014	0.608555	0.912511	0.868 (0.565, 1.332)	0.761 (0.568, 1.019)	0.739 (0.469, 1.163)	1.1408	1.17533	1.03027
OTU3476 Peptostreptococcaceae XI [G-3] bacterium FOT-062	0.946331	0.6962	0.626941	0.85062	0.088 (0.061, 0.126)	0.08 (0.063, 0.102)	0.077 (0.053, 0.112)	1.08953	1.13665	1.04325
OTU741 Clostridiales bacterium COT-386	0.958092	0.131838	0.783778	0.191127	0.032 (0.011, 0.095)	0.079 (0.05, 0.123)	0.039 (0.015, 0.102)	0.403541	0.816572	2.02352
OTU2315 Parvimonas sp.	0.965676	0.665079	0.826517	0.853484	0.085 (0.05, 0.147)	0.098 (0.071, 0.135)	0.093 (0.056, 0.154)	0.871355	0.921348	1.05737
OTU3244 Peptostreptococcaceae bacterium COT-057	0.980328	0.793445	0.91169	0.691727	0.077 (0.046, 0.127)	0.083 (0.061, 0.113)	0.074 (0.044, 0.122)	0.924299	1.04075	1.12599
OTU2279 Peptostreptococcaceae XI [G-3] bacterium FOT-054	0.986756	0.805786	0.760731	0.909112	0.744 (0.49, 1.128)	0.79 (0.61, 1.023)	0.812 (0.55, 1.198)	0.940951	0.916028	0.973513
OTU3526 Proteocatella sp. FOT-051	0.989707	0.784278	0.989249	0.789059	0.161 (0.085, 0.306)	0.145 (0.094, 0.223)	0.161 (0.086, 0.301)	1.11285	1.00412	0.902296
OTU5602 Brachymonas sp. FOT-073	0.989707	0.828104	0.691072	0.797934	0.181 (0.091, 0.359)	0.166 (0.105, 0.26)	0.148 (0.071, 0.307)	1.09384	1.22201	1.11718
OTU8742 Actinomyces weissii	0.989707	0.884621	0.793045	0.867208	0.059 (0.038, 0.092)	0.057 (0.043, 0.076)	0.054 (0.035, 0.085)	1.0394	1.0874	1.04618
OTU5236 Peptostreptococcaceae bacterium COT-166	0.99001	0.270869	0.478767	0.720455	0.046 (0.016, 0.128)	0.086 (0.054, 0.139)	0.073 (0.033, 0.161)	0.53228	0.628849	1.18143
Rare	0.200799	0.262752	0.389742	0.0345218	4.519 (3.77, 5.408)	5.09 (4.569, 5.669)	4.037 (3.349, 4.859)	0.88772	1.11937	1.26095
