# Supplementary material for: A Pyrosequencing Investigation of Differences in the Feline Subgingival Microbiota in Health, Gingivitis and Mild Periodontitis
Source: PLoS One. 2015 Nov 25;10(11):e0136986. doi: 10.1371/journal.pone.0136986 (PMC4659563; doi:10.1371/journal.pone.0136986)
Supplement: S7 Table — (XLSX) [file pone.0136986.s011.xlsx]

## Sheet: Sheet1
Supplementary table 7a
Health status	Average percentage aerobic sequences			Average percentage anaerobic sequences			Average percentage facultative anaerobic sequences
	Mean	95% CI		Mean	95% CI		Mean	95% CI
		Lower	Upper		Lower	Upper		Lower	Upper
Healthy	21.4	16.6	27.2	50.7	43.1	58.4	23.3	19.2	28.1
Gingivitis	15.5	12.7	18.7	59.9	55	64.6	19.5	17	22.3
PD1	5.5	3.3	9.3	75.6	68.6	81.4	14.9	11.6	18.9
Supplementary table 7b
Health status contrast			Health vs Gingivitis	Health vs PD1	PD1 vs Gingivitis
Comparisons between aerobic sequences	Odds Ratio		1.49	4.64	3.13
	95% CI	Lower	1.01	2.45	1.72
		Upper	2.2	8.78	5.69
	p-value		0.047	<0.001	<0.001
Comparisons between anaerobic sequences	Odds ratio		0.69	0.33	0.48
	95% CI	Lower	0.48	0.21	0.32
		Upper	1	0.53	0.72
	p-value		0.048	<0.001	0.001
Comparisons between facultative anaerobic sequences	Odds ratio		1.26	1.74	1.39
	95% CI	Lower	0.93	1.19	1
		Upper	1.7	2.55	1.94
	p-value		0.137	0.005	0.053
