# Supplementary material for: A Pyrosequencing Investigation of Differences in the Feline Subgingival Microbiota in Health, Gingivitis and Mild Periodontitis
Source: PLoS One. 2015 Nov 25;10(11):e0136986. doi: 10.1371/journal.pone.0136986 (PMC4659563; doi:10.1371/journal.pone.0136986)
Supplement: S8 Table — (XLSX) [file pone.0136986.s012.xlsx]

## Sheet: Sheet1
	Supplementary table 8a
	Health status	Mean Number of OTUs	95% CI
			Lower	Upper
	Health	332	295	368
	Gingivitis	374	351	397
	PD1	360	325	394
	Supplementary table 8b
	Health status contrast	Difference in Means	95% CI		Pr(>|z|)
			Lower	Upper
	Health vs PD1	-27.9	-78.2	22.5	0.274
	Health vs Gingivitis	-41.8	-84.8	1.2	0.057
	PD1 vs Gingivitis	-13.9	-55.6	27.8	0.508
